# Supplementary material for: Arabidopsis PFA-DSP-Type Phosphohydrolases Target Specific Inositol Pyrophosphate Messengers
Source: PubMed Central journal article supplement — Biochemistry. 2022 May 31;61(12):1213–27. doi: 10.1021/acs.biochem.2c00145 (PMC9351621; doi:10.1021/acs.biochem.2c00145), 2022-05-31
Supplement: bi2c00145_si_001.pdf [file bi2c00145_si_001.pdf]

# 1 Supporting Information

## 2 Short title

3 *A. thaliana* inositol pyrophosphate phosphohydrolases

## 4 Article title

5 ***Arabidopsis* PFA-DSP-type phosphohydrolases target specific inositol**  
6 **pyrophosphate messengers**

7 Philipp Gaugler<sup>1§</sup>, Robin Schneider<sup>1§</sup>, Guizhen Liu<sup>2</sup>, Danye Qiu<sup>2</sup>, Jonathan Weber<sup>1</sup>, Jochen  
8 Schmid<sup>3&</sup>, Nikolaus Jork<sup>2,4</sup>, Markus Häner<sup>2</sup>, Kevin Ritter<sup>2</sup>, Nicolás Fernández-Rebollo<sup>3</sup>, Ricardo  
9 F.H. Giehl<sup>5</sup>, Minh Nguyen Trung<sup>6</sup>, Ranjana Yadav<sup>7</sup>, Dorothea Fiedler<sup>6</sup>, Verena Gaugler<sup>1</sup>,  
10 Henning J. Jessen<sup>2</sup>, Gabriel Schaaf<sup>1\*</sup>, Debabrata Laha<sup>7\*</sup>

11 <sup>1</sup>Department of Plant Nutrition, Institute of Crop Science and Resource Conservation,  
12 Rheinische Friedrich-Wilhelms-Universität Bonn, 53115 Bonn, Germany

13 <sup>2</sup>Department of Chemistry and Pharmacy and CIBSS-Centre for Integrative Biological  
14 Signalling Studies, Albert-Ludwigs University Freiburg, 79104 Freiburg, Germany

15 <sup>3</sup>Center for Plant Molecular Biology, Department of Plant Physiology, Eberhard Karls  
16 University Tübingen, 72076 Tübingen, Germany

17 <sup>4</sup>Spemann Graduate School of Biology and Medicine (SGBM), University of Freiburg, 79104  
18 Freiburg, Germany

19 <sup>5</sup>Department of Physiology & Cell Biology, Leibniz-Institute of Plant Genetics and Crop Plant  
20 Research, 06466 Gatersleben, Germany

21 <sup>6</sup>Leibniz-Forschungsinstitut für Molekulare Pharmakologie, 13125 Berlin, Germany;  
22 Department of Chemistry, Humboldt Universität zu Berlin, 12489 Berlin, Germany.

23 <sup>7</sup>Department of Biochemistry, Indian Institute of Science (IISc), Bengaluru-560012, India

24 <sup>§</sup>P.G. and R.S. contributed equally to this manuscript

25 \*E-mail: gabriel.schaaf@uni-bonn.de, dlaha@iisc.ac.in

26

27 ORCID IDs: P.G.: 0000-0002-9187-404X, R.S. 0000-0002-9657-4548, G.L. 0000-0003-1748-  
28 6687, DQ: 0000-0003-2197-3218, J.S.: 0000-0001-7527-7088, N.J.: 0000-0002-3717-443X,  
29 M.H.: 0000-0003-3313-4868, K.R.: 0000-0001-7900-1855, N.F.R.: 0000-0003-3556-8766,  
30 R.F.H.G: 0000-0003-1006-3163, M.N.T.: 0000-0003-3100-9609, R.Y.: 0000-0003-4956-5638,  
31 D.F.: 0000-0002-0798-946X, V.G.: 0000-0002-3249-2922, H.J.J: 0000-0002-1025-9484, GS:  
32 0000-0001-9022-4515, D.L.: 0000-0002-7823-5489

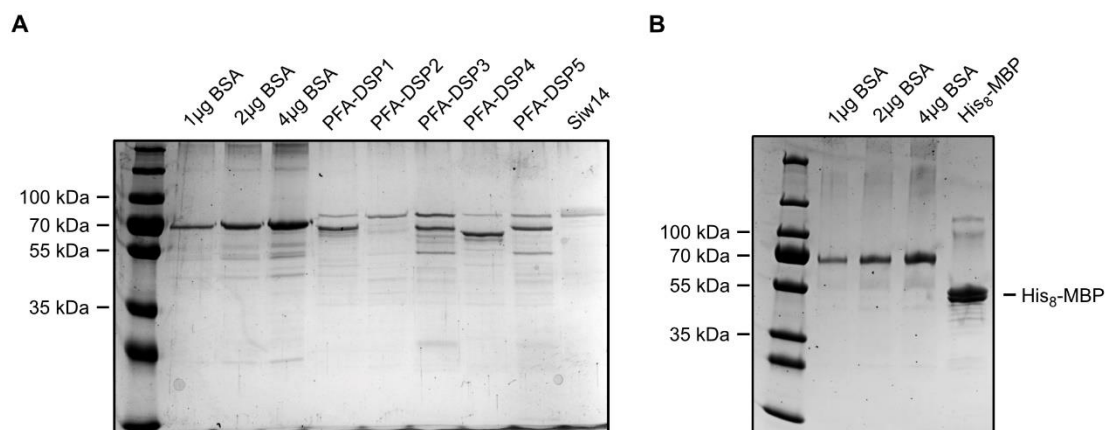

**Figure S1: Purification of PFA-DSP proteins.** (A, B) Recombinant His-MBP-PFA-DSPs or His-MBP-Siw14 were expressed in *E. coli* and purified with Ni-NTA resin as described in methods. Dialyzed proteins were denatured and separated by SDS-PAGE in parallel with BSA standards to determine protein concentrations by staining with Coomassie blue.

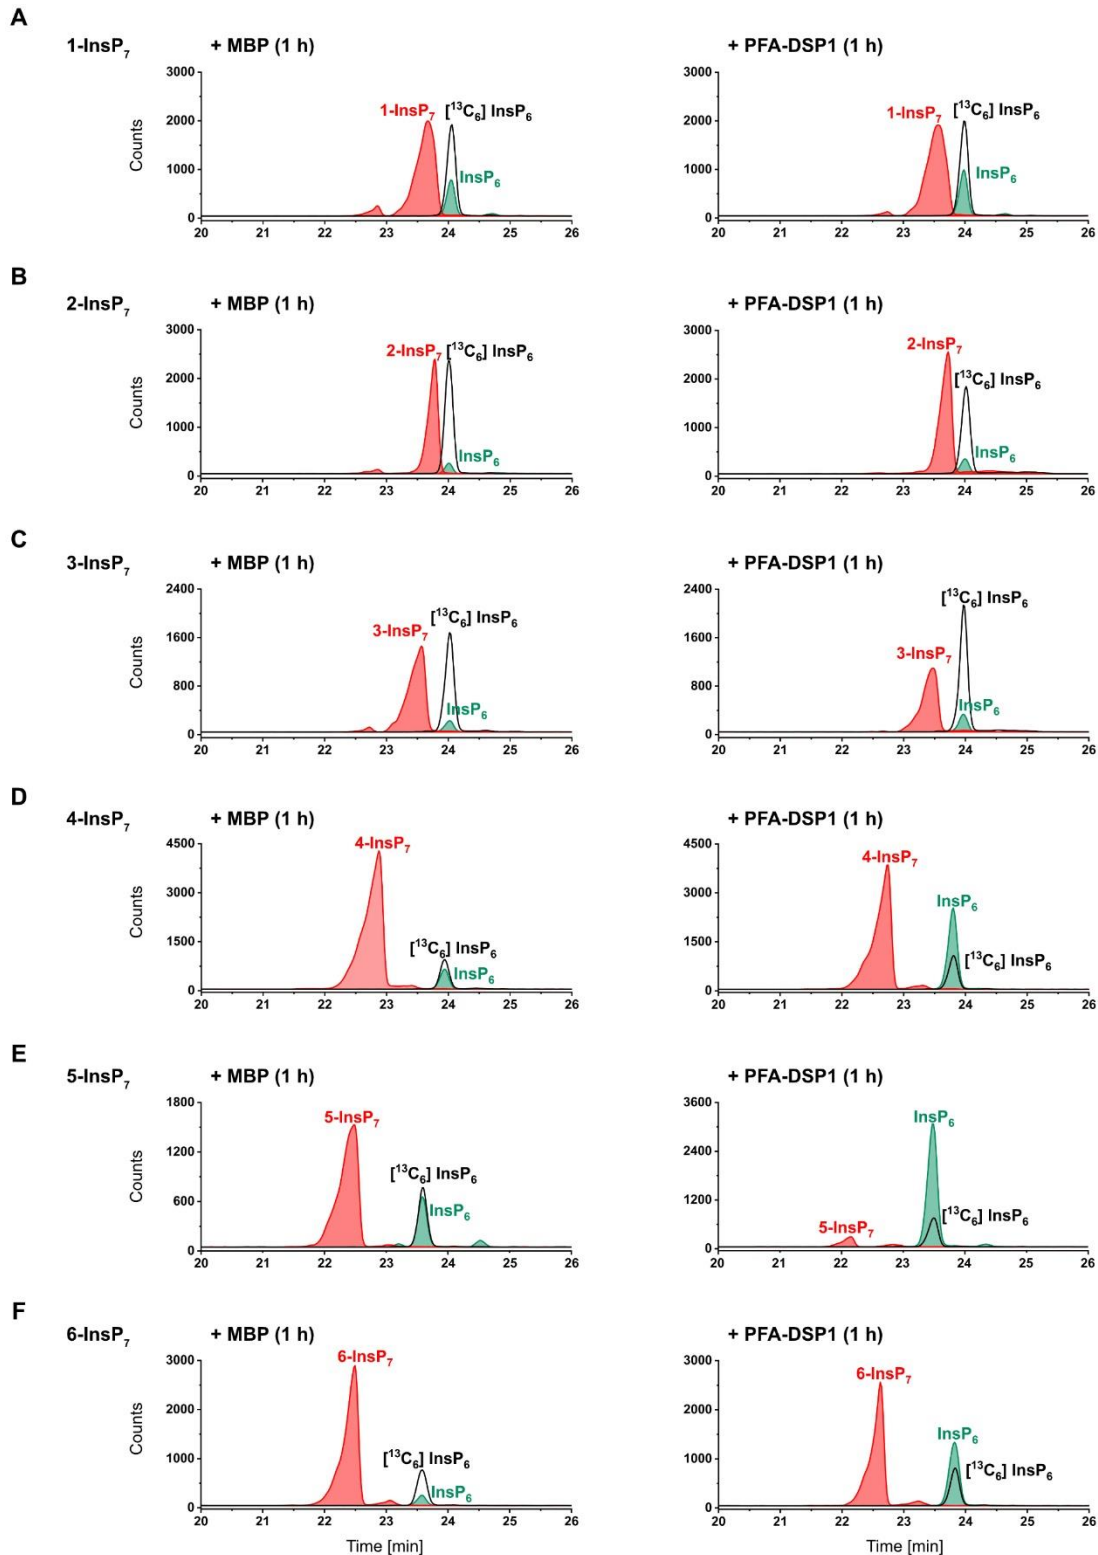

**Figure S2: *In vitro*, *Arabidopsis* PFA-DSP1 displays robust PP-InsP phosphohydrolase activity against 5-InsP<sub>7</sub> and partial phosphohydrolase activity against 4-InsP<sub>7</sub> and 6-InsP<sub>7</sub>, respectively. (A – F) 0.4 μM PFA-DSP1 was incubated with 0.33 mM InsP<sub>7</sub> and 1 mM MgCl<sub>2</sub> for 1 h. The reaction product was spiked with an isotopic standards mixture ([<sup>13</sup>C<sub>6</sub>]1,5-InsP<sub>8</sub>, [<sup>13</sup>C<sub>6</sub>]5-InsP<sub>7</sub>, [<sup>13</sup>C<sub>6</sub>]1-InsP<sub>7</sub>, [<sup>13</sup>C<sub>6</sub>] InsP<sub>6</sub>, [<sup>13</sup>C<sub>6</sub>]2-OH InsP<sub>5</sub>) and subjected to CE-ESI-MS analyses. Representative extracted-ion electropherograms of samples shown in Figure 1.**

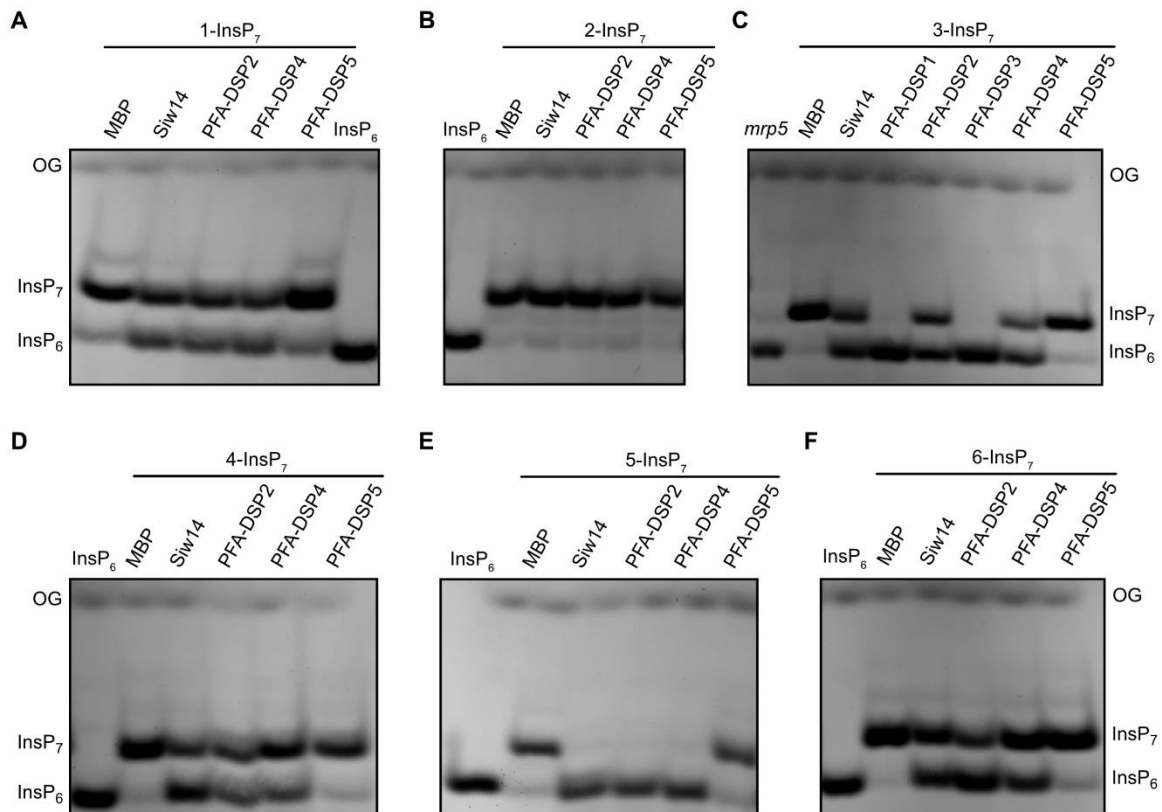

**Figure S3: In the absence of divalent cations, all InsP<sub>7</sub> isomers with the exception of 2-InsP<sub>7</sub> become substrates for selected *Arabidopsis* PFA-DSPs *in vitro*.** (A – F) Approximately 0.4 μM His-MBP-PFA-DSPs and His-MBP were incubated with 1 mM EDTA and 0.33 mM InsP<sub>7</sub> for 1 h at 22°C. His-MBP served as a negative control. The reaction products were separated by 33 % PAGE and visualized with toluidine blue. The identity of bands was determined by migration compared to InsP<sub>6</sub> or (C) compared to TiO<sub>2</sub>-purified *mrp5* seed extract.

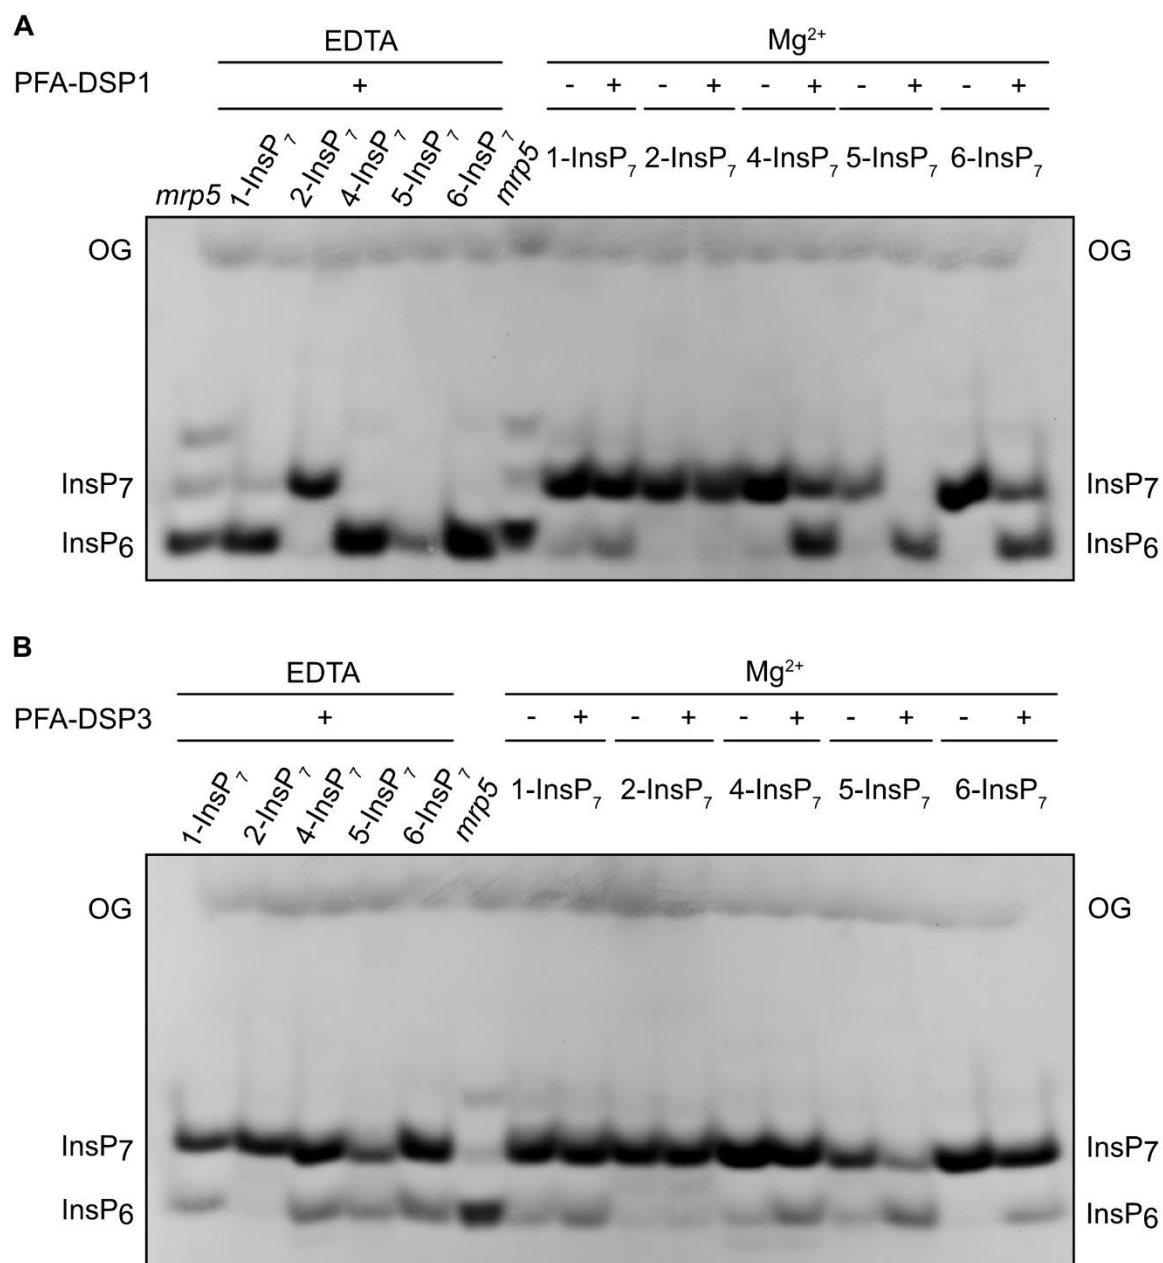

**Figure S4: In the presence of Mg<sup>2+</sup>, PFA-DSP1 and PFA-DSP3 display robust *in vitro* InsP<sub>7</sub> phosphohydrolase activity with high specificity for the 5-β-phosphate.** (A – B) Approximately 0.4 μM His-MBP-PFA-DSP1 and His-MBP-PFA-DSP3 were incubated with 0.33 mM InsP<sub>7</sub> and 1 mM EDTA or 1 mM MgCl<sub>2</sub> for 1 h at 22°C. His-MBP served as a negative control. The reaction products were separated by 33 % PAGE and visualized with toluidine blue. The identity of bands was determined by migration compared to TiO<sub>2</sub>-purified *mrp5* seed extract.

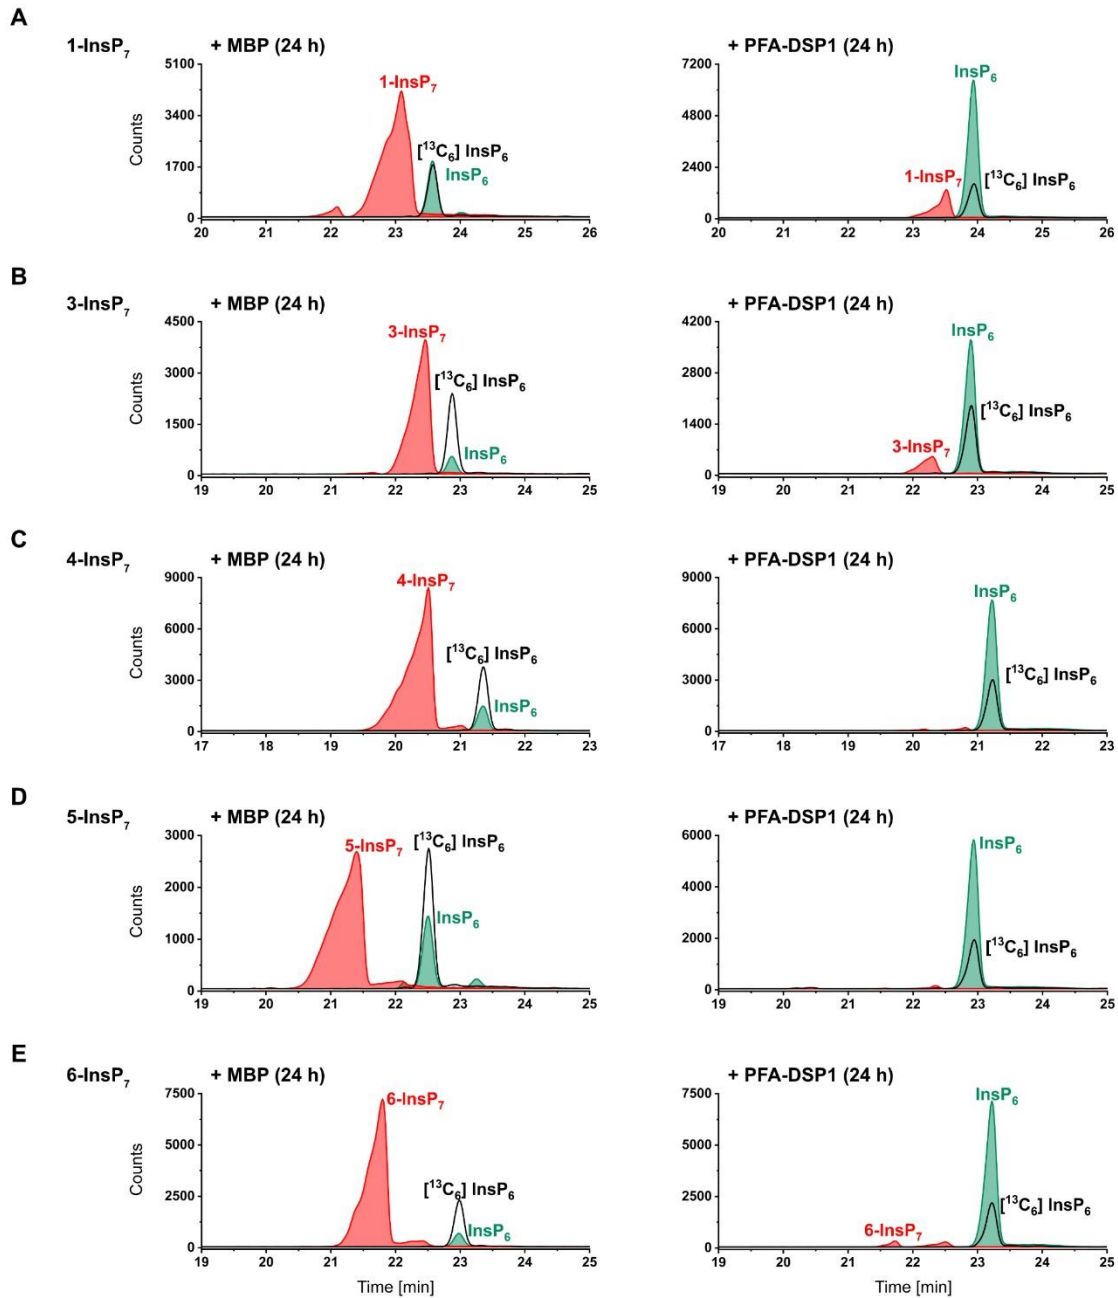

**Figure S5: Under prolonged incubation time, *Arabidopsis* PFA-DSP1 efficiently hydrolyzes 5-InsP<sub>7</sub>, 4-InsP<sub>7</sub> and 6-InsP<sub>7</sub> but only displays partial activities against 1-InsP<sub>7</sub> and 3-InsP<sub>7</sub>.** (A – E) 0.4 μM PFA-DSP1 was incubated with 0.33 mM InsP<sub>7</sub> and 1 mM MgCl<sub>2</sub> for 24 h. The reaction product was spiked with an isotopic standards mixture ([<sup>13</sup>C<sub>6</sub>]1,5-InsP<sub>8</sub>, [<sup>13</sup>C<sub>6</sub>]5-InsP<sub>7</sub>, [<sup>13</sup>C<sub>6</sub>]1-InsP<sub>7</sub>, [<sup>13</sup>C<sub>6</sub>] InsP<sub>6</sub>, [<sup>13</sup>C<sub>6</sub>]2-OH InsP<sub>5</sub>) and subjected to CE-ESI-MS analyses. Representative extracted-ion electropherograms of samples shown in Figure 2.

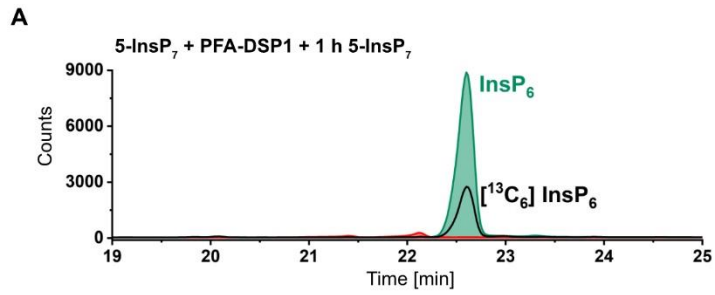

**Figure S6: *Arabidopsis* PFA-DSP1 maintains 5-InsP<sub>7</sub> phosphohydrolase activity during prolonged incubation time *in vitro*.** (A) 0.4 μM PFA-DSP1 was incubated with 0.33 mM 5-InsP<sub>7</sub> and 1 mM MgCl<sub>2</sub> for 24 h. To ensure that PFA-DSP1 is active during the whole incubation time, 0.33 mM 5-InsP<sub>7</sub> was added after 23 h and incubated for another 1 h. The reaction product was spiked with an isotopic standards mixture ([<sup>13</sup>C<sub>6</sub>]1,5-InsP<sub>8</sub>, [<sup>13</sup>C<sub>6</sub>]5-InsP<sub>7</sub>, [<sup>13</sup>C<sub>6</sub>]1-InsP<sub>7</sub>, [<sup>13</sup>C<sub>6</sub>] InsP<sub>6</sub>, [<sup>13</sup>C<sub>6</sub>]2-OH InsP<sub>5</sub>) and subjected to CE-ESI-MS analyses.

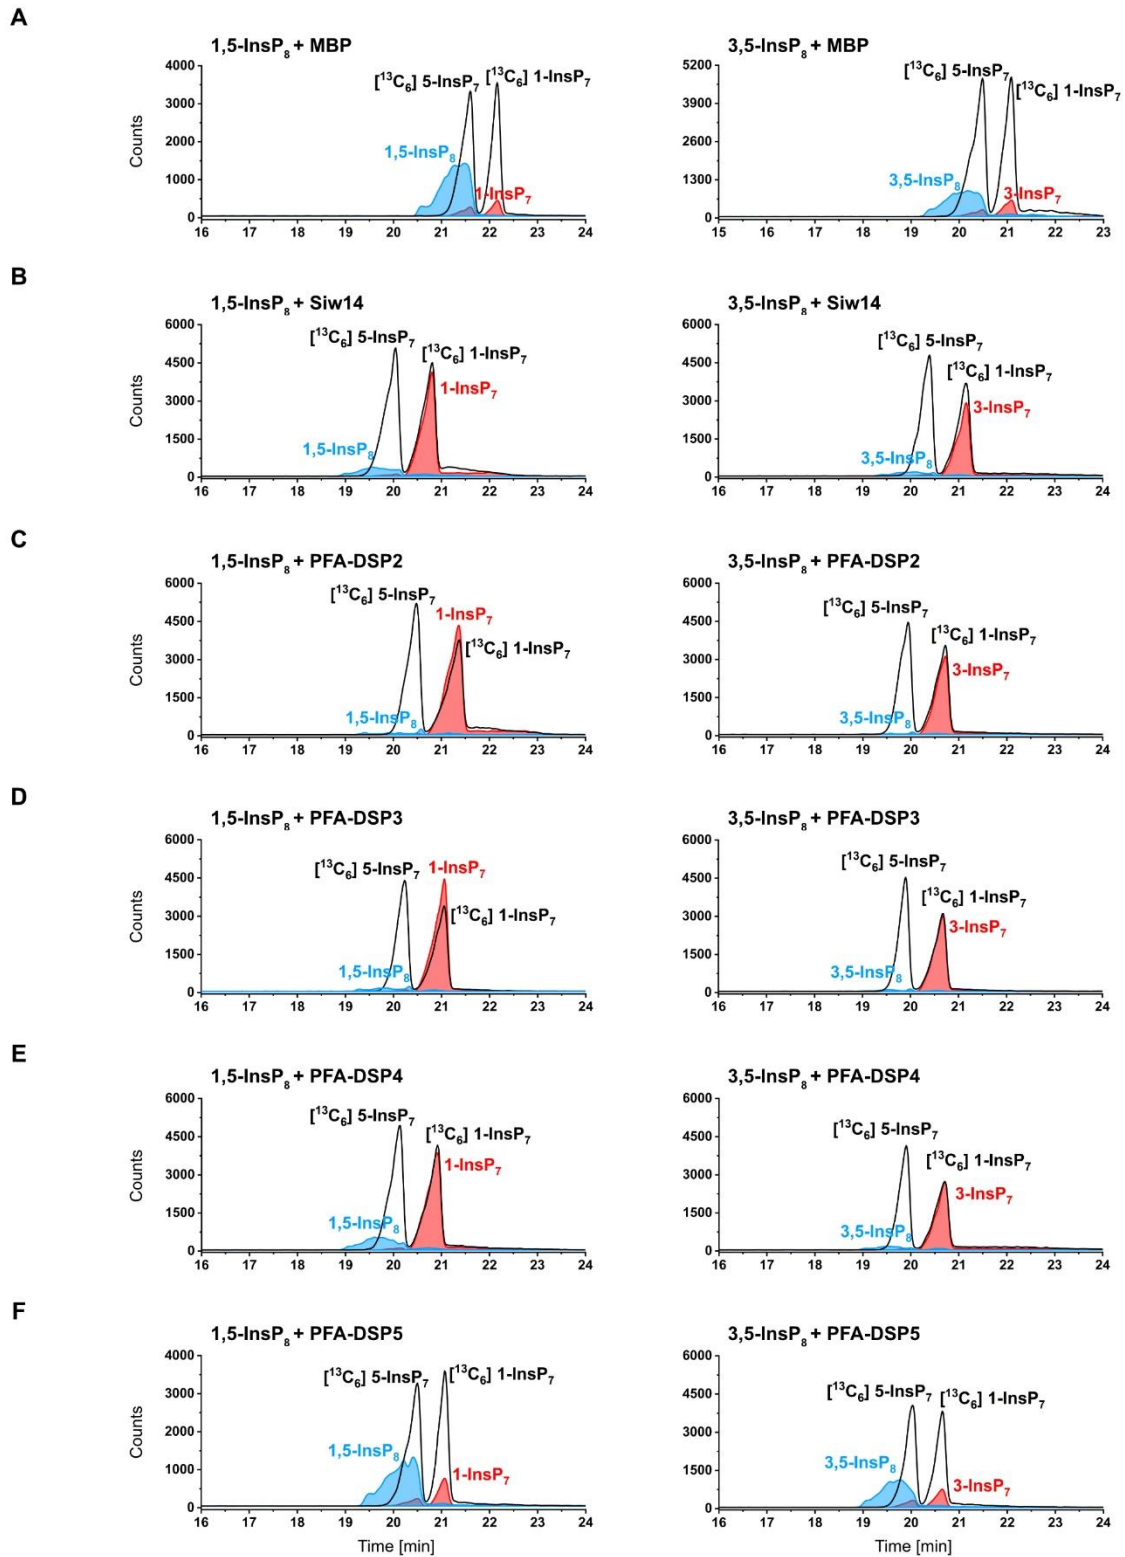

**Figure S7: *In vitro*, *Arabidopsis* PFA-DSPs display robust 1/3,5-InsP<sub>8</sub> phosphohydrolyase activity.** (A – F) Approximately 0.4 μM His-MBP-PFA-DSPs and His-MBP-Siw14 were incubated with 0.33 mM 1,5-InsP<sub>8</sub> or 3,5-InsP<sub>8</sub> and 1 mM MgCl<sub>2</sub> for 1 h. The reaction products were spiked with isotopic standards mixture ([<sup>13</sup>C<sub>6</sub>]1,5-InsP<sub>8</sub>, [<sup>13</sup>C<sub>6</sub>]5-InsP<sub>7</sub>, [<sup>13</sup>C<sub>6</sub>]1-InsP<sub>7</sub>, [<sup>13</sup>C<sub>6</sub>] InsP<sub>6</sub>, [<sup>13</sup>C<sub>6</sub>]2-OH InsP<sub>5</sub>) and subjected to CE-ESI-MS analyses. Representative extracted-ion electropherograms of samples shown in Figure 3C.



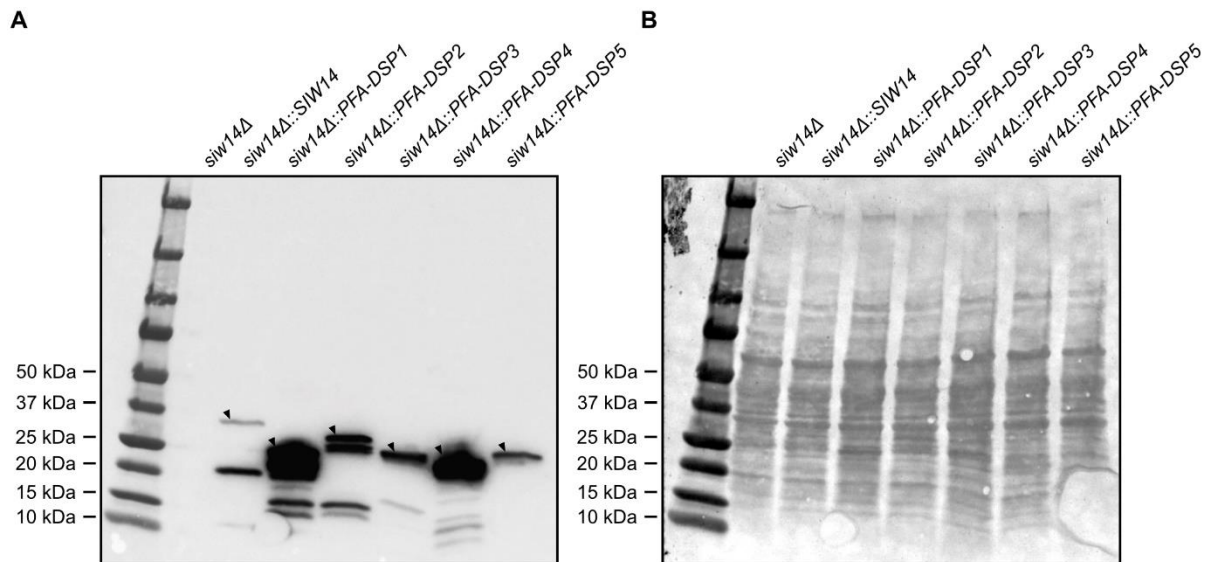

**Figure S8: All five PFA-DSP homologs are stably expressed in the *siw14Δ* yeast strain.** Immunoblot analyses of protein extracts from *siw14Δ* yeast transformed with either empty pDRf1-GW plasmid or pDRf1-GW carrying *SIW14* or *PFA-DSP1–5* encoding translational fusions with a C-terminal V5-tag. (A) For detection of V5-tagged proteins, an anti-V5 tag primary antibody (Invitrogen; 1:2000 dilution) and an anti-mouse secondary antibody coupled with HRP (Bio-Rad; goat; 1:10000 dilution) were used. The chemiluminescence signal of the ECL substrate (Bio-Rad) was detected using the ChemiDoc MP imager (Bio-Rad). Black arrows indicate the specific protein bands based on the calculated molecular weight. (B) Ponceau staining of the same blot.

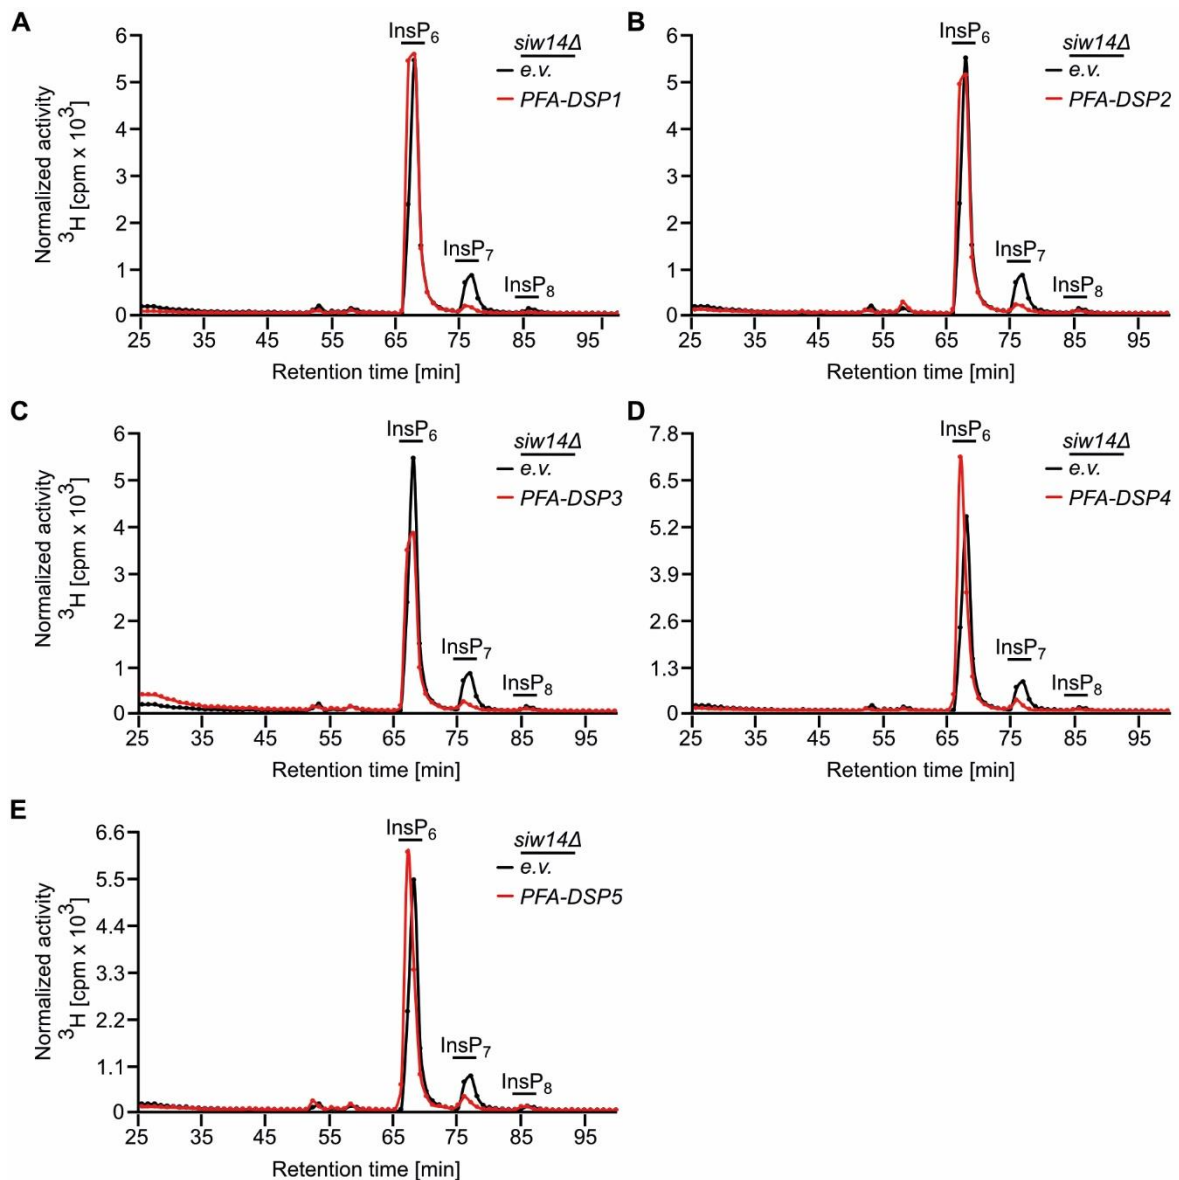

**Figure S9: Heterologous expression of *Arabidopsis* PFA-DSPs complements *siw14Δ*-associated defects in  $InsP_7/InsP_6$  ratios in yeast.** (A - E) SAX-HPLC profiles of radiolabeled *siw14Δ* yeast transformed with either empty pDRf1-GW plasmid (e.v.) or pDRf1-GW carrying *PFA-DSP1* - 5. Depicted is a representative analysis of each *PFA-DSP* transformant, with the same analysis of a representative empty vector transformant shown in the same profile in each graph. The experiment was repeated twice ( $n = 3$ ) with similar results (combined data shown in Figure 4B).



(Invitrogen; 1:2000 dilution) and an anti-mouse secondary antibody coupled with Alexa Fluor plus 800 (Invitrogen; goat; 1:20000 dilution) were used. As loading control, Gal4 protein levels were detected simultaneously using a polyclonal anti-Gal4 antibody (Santa Cruz; 1:1000 dilution) and an anti-rabbit StarBright Blue 700 antibody (Bio-Rad, goat; 1:2500 dilution). The signal was detected using the multiplex function of the ChemiDoc MP imager (Bio-Rad). (D) SAX-HPLC profiles of extracts of radiolabeled *siw14Δ* yeast transformed with either empty pDRf1-GW plasmid (empty vector) or pDRf1-GW carrying either *SIW14* or *SIW14<sup>C214S</sup>*. (E) SAX-HPLC profiles of radiolabeled *siw14Δ* yeast transformed with either empty pDRf1-GW plasmid (e.v.) or pDRf1-GW carrying either *PFA-DSP1* or *PFA-DSP1<sup>C150S</sup>*. (B – E) The experiments were repeated independently with similar results.

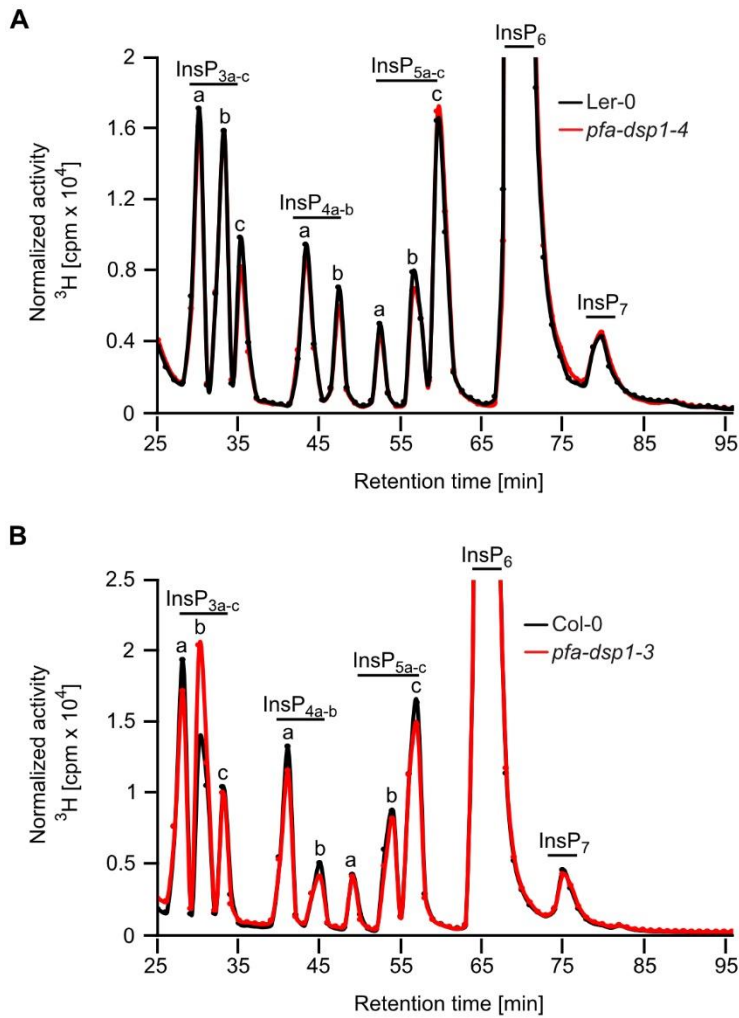

**Figure S11: Single mutant *Arabidopsis pfa-dsp1* loss-of-function lines do not display InsP/PP-InsP defects.** Representative SAX-HPLC profiles of 20-days-old wild-type Ler-0 and *pfa-dsp1-4* *Arabidopsis* seedlings (A) and of Col-0 and *pfa-dsp1-3* *Arabidopsis* seedlings (B) radiolabeled with [ $^3\text{H}$ ]-myo-inositol. All visible peaks are highlighted and assigned to the corresponding InsP species. Based on published chromatographic mobilities<sup>1,2</sup>, InsP<sub>4a</sub> likely represents Ins(1,4,5,6)P<sub>4</sub> or Ins(3,4,5,6)P<sub>4</sub>, InsP<sub>5a</sub> likely represents InsP<sub>5</sub> [2-OH], InsP<sub>5b</sub> likely represents InsP<sub>5</sub> [4-OH] or its enantiomeric form InsP<sub>5</sub> [6-OH], and InsP<sub>5c</sub> likely represents InsP<sub>5</sub> [1-OH] or its enantiomeric form InsP<sub>5</sub> [3-OH]. The isomeric natures of InsP<sub>3a-c</sub>, InsP<sub>4b</sub>, InsP<sub>7</sub>, and InsP<sub>8</sub> are unknown.

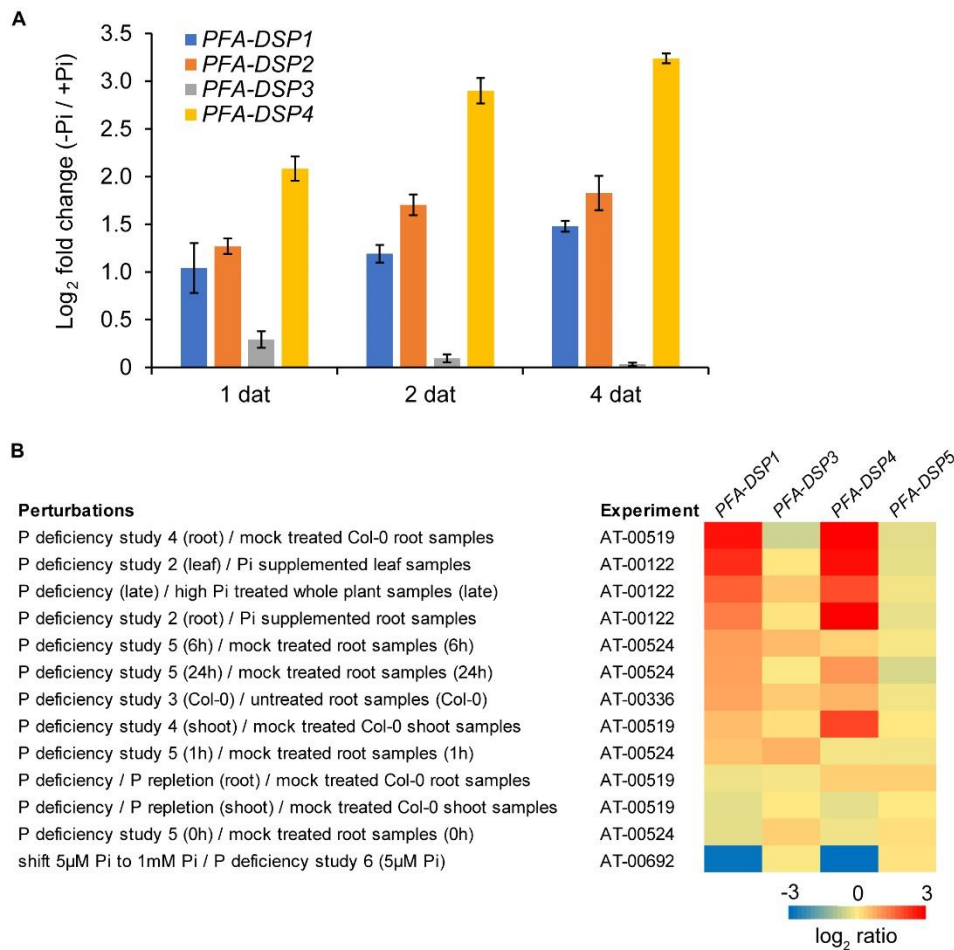

**Figure S12: *Arabidopsis* PFA-DSP1, 2 and 4 are strongly induced by P<sub>i</sub> deficiency.** (A) Expression of the indicated *PFA-DSPs* in roots of *Arabidopsis thaliana* (accession Col-0) plants according to a transcriptome experiment with Agilent microarrays<sup>3</sup>; data deposited on e!DAL repository under the accession code <https://doi.org/10.5447/IPK/2018/4>. No probe for *PFA-DSP5* was present in the microarray chips. Seven-day-old plants pre-cultured on sufficient P<sub>i</sub> supply were transferred to fresh solid media containing 625 μM P<sub>i</sub> (+Pi) or 100 μM P<sub>i</sub> (-Pi). Whole roots were collected at the indicated time points after transfer. Data represent means ± SD (n = 3). (B) Heatmap analysis of *PFA-DSPs* genes in response to the indicated P<sub>i</sub> treatments. No data are presented for *PFA-DSP2* as no probe for this gene is present in Affimetrix chips. Transcriptional data were retrieved and analyzed with Genevestigator (<http://www.genevestigator.ethz.ch>).

**Table S1: Overview of *Arabidopsis* PFA-DSP substrate specificities in presence of Mg<sup>2+</sup> showing a robust PP-InsP phosphohydrolase activity against 5-InsP<sub>7</sub>, 1,5-InsP<sub>8</sub> and 3,5-InsP<sub>8</sub>, *in vitro*.** The table summarizes the *in vitro* results of Figure 1, 3, S2 and S7. (-) indicates no substrate, (+) poor substrate, (++) good substrate and n.d. no data.

| Mg <sup>2+</sup> | 1-InsP <sub>7</sub> | 2-InsP <sub>7</sub> | 3-InsP <sub>7</sub> | 4-InsP <sub>7</sub> | 5-InsP <sub>7</sub> | 6-InsP <sub>7</sub> | 1,5-InsP <sub>8</sub> | 3,5-InsP <sub>8</sub> |
|------------------|---------------------|---------------------|---------------------|---------------------|---------------------|---------------------|-----------------------|-----------------------|
| Siw14            | (-)                 | (-)                 | (-)                 | (+)                 | (++)                | (+)                 | (++)                  | (++)                  |
| PFA-DSP1         | (+)                 | (-)                 | (+)                 | (+)                 | (++)                | (+)                 | (++)                  | (++)                  |
| PFA-DSP2         | (-)                 | (-)                 | (-)                 | (+)                 | (++)                | (+)                 | (++)                  | (++)                  |
| PFA-DSP3         | (+)                 | (-)                 | (+)                 | (+)                 | (++)                | (+)                 | (++)                  | (++)                  |
| PFA-DSP4         | (+)                 | (-)                 | (+)                 | (+)                 | (++)                | (+)                 | (++)                  | (++)                  |
| PFA-DSP5         | (-)                 | (-)                 | (-)                 | (-)                 | (-)                 | (-)                 | (-)                   | (-)                   |
| PFA-DSP5 *       | (-)                 | (-)                 | (-)                 | (+)                 | (++)                | (+)                 | n.d.                  | n.d.                  |

\* tested with a higher PFA-DSP5 concentration and increased incubation time

**Table S2: Oligonucleotide sequences.**

| <b>Primer name</b>  | <b>Sequence</b>                                                                                              |
|---------------------|--------------------------------------------------------------------------------------------------------------|
| attB1 adapter       | GGGGACAAGTTTGTACAAAAAAGCAGGCTTC                                                                              |
| attB2 adapter       | GGGGACCACTTTGTACAAGAAAGCTGGGTC                                                                               |
| attB2+V5 adapter    | GGGGACCACTTTGTACAAGAAAGCTGGGTCCTTAC <u>CGTAGAATCGAGACCGAGGAGAGGG</u><br><u>TTAGGGATAGGCTTACCTCCTCCAGATCC</u> |
| attB1_ScSIW14       | AAAAAGCAGGCTTCATGGGTTTATATCAAGCAAAG                                                                          |
| attB2_ScSIW14s      | AAAAAGCAGGCTTCATGGGTTTATATCAAGCAAAG                                                                          |
| attB2_ScSIW14V5     | <u>CTTACCTCCTCCAGATCCCCATTGTAGAGGCAACCAG</u>                                                                 |
| attB1_AtPFA-DSP1    | AAAAAGCAGGCTTCATGAAGCTTGTGGAGAAGAC                                                                           |
| attB2_AtPFA-DSP1ns  | AGAAAGCTGGGTCCCTGATGGAACAAGAGAATG                                                                            |
| attB2_AtPFA-DSP1s   | AGAAAGCTGGGTCTTACCTGATGGAACAAGAG                                                                             |
| attB2_AtPFA-DSP1V5  | <u>ACCTCCTCCAGATCCCTGATGGAACAAGAGAATG</u>                                                                    |
| attB1_AtPFA-DSP2    | AAAAAGCAGGCTTCATGAACTGATTGAGAAGACG                                                                           |
| attB2_AtPFA-DSP2s   | AGAAAGCTGGGTCTTACCTATTGGAGCAAGAAAAAG                                                                         |
| attB2_AtPFA-DSP2V5  | <u>ACCTCCTCCAGATCCCTATTGGAGCAAGAAAAAGAC</u>                                                                  |
| attB1_AtPFA-DSP3    | AAAAAGCAGGCTTCATGTGTTGATTATGGAAACGG                                                                          |
| attB2_AtPFA-DSP3s   | AGAAAGCTGGGTCTTAACTCTAGCAGCCTGCG                                                                             |
| attB2_AtPFA-DSP3V5  | <u>ACCTCCTCCAGATCCAACCTCTAGCAGCCTGCGG</u>                                                                    |
| attB1_AtPFA-DSP4    | AAAAAGCAGGCTTCATGACGTTAGAGAGTTACGCCG                                                                         |
| attB2_AtPFA-DSP4s   | AGAAAGCTGGGTCTCAGTAATCAATAGTATTAGTATACCTCTTGG                                                                |
| attB2_AtPFA-DSP4V5  | <u>ACCTCCTCCAGATCCGTAATCAATAGTATTAGTATACCTCTTGG</u>                                                          |
| attB1_AtPFA-DSP5    | AAAAAGCAGGCTTCATGGGCTTAATTGTGGATGATG                                                                         |
| attB2_AtPFA-DSP5s   | AGAAAGCTGGGTCTTATCCTTTGGTGGCTTGAGG                                                                           |
| attB2_AtPFA-DSP5V5  | <u>ACCTCCTCCAGATCCTCCTTTGGTGGCTTGAGG</u>                                                                     |
| ScSIW14_C214S_F     | TCAACCGATACTGATACATTCTAATAGAGGCAAACATAGAAC                                                                   |
| ScSIW14_C214S_R     | GTTCTATGTTTGCCTCTATTAGAATGTATCAGTATCGGTTGA                                                                   |
| AtPFA-DSP1_C150S_F  | GTTCTGATTCATAGTAAGCGAGGC                                                                                     |
| AtPFA-DSP1_C150S_R  | GCCTCGCTTACTATGAATCAGAACA                                                                                    |
| ScSIW14pgt_PstI_F   | AGCCTGCAGGATGGAGCTGCTCCTGGCTG                                                                                |
| ScSIW14pgt_EcoRI_R  | GAATTC AATATAAAGCGGGAATTTTTTTTTTTC                                                                           |
| AtPFA-DSP1_267_F    | ATACTTGTGCCCGGAGCCCT                                                                                         |
| AtPFA-DSP1_373_R    | TCACAAATGGCTCCTTGTGCCT                                                                                       |
| AtTIP41-like_F      | TGGTTGGAAGCAGGAAGGGCT                                                                                        |
| AtTIP41-like_R      | TGCTGAGACGGCTTGCTCCTGA                                                                                       |
| AtPP2AA3_F_qPCR     | TGGTGCTCAGATGAGGGAGA                                                                                         |
| AtPP2AA3_R_qPCR     | TAGCACATCTGGGGCACTTG                                                                                         |
| ScSIW14_pUG_F       | CTCTTCTGGATCAATTTTTCTTTTTCATCTAAAGTTTAAAAGGAGCAGCTGAAGCTTCGTA<br>CGC                                         |
| ScSIW14_pUG_R       | CATCATTTTTCGAAGAGACTAGTTACGTAAGGTAATCACTGTCTACATAGCATAGGCCAC<br>TAGTGGATCTG                                  |
| WiscDsLox_473B10_LP | TTGTTTTGCAAAACTGCAAAG                                                                                        |
| WiscDsLox_473B10_RP | TTGCCTTCAATACCAAAGCTGG                                                                                       |
| P745_WiscDsLox_F    | AACGTCCGCAATGTGTTATTAAGTTGTC                                                                                 |
| GT1415_F            | CGACTCTCCTCACCTAAAGATTCA                                                                                     |
| GT1415_R            | GTTGCCTTCAATACCAAAGCTGG                                                                                      |
| DS3-1               | ACCCGACCGGATCGTATCGGT                                                                                        |
| SAIL_116_C12_LP     | TTGTTTTGCAAAACTGCAAAG                                                                                        |
| SAIL_116_C12_RP     | TTGCCTTCAATACCAAAGCTGG                                                                                       |
| LB1_SAIL_F          | GCCTTTTCAGAAATGGATAAATAGCCTTGCTTCC                                                                           |



&Present address: Department of Biomedicine, University of Basel, 4058 Basel, Switzerland

## References

1. Kuo, H. F., Hsu, Y. Y., Lin, W. C., Chen, K. Y., Munnik, T., Brearley, C. A., and Chiou, T. J. (2018) Arabidopsis inositol phosphate kinases IPK1 and ITPK1 constitute a metabolic pathway in maintaining phosphate homeostasis, *Plant J.*
2. Stevenson-Paulik, J., Bastidas, R. J., Chiou, S. T., Frye, R. A., and York, J. D. (2005) Generation of phytate-free seeds in Arabidopsis through disruption of inositol polyphosphate kinases, *Proc Natl Acad Sci U S A* 102, 12612-12617.
3. Bhosale, R., Giri, J., Pandey, B. K., Giehl, R. F. H., Hartmann, A., Traini, R., Truskina, J., Leftley, N., Hanlon, M., Swarup, K., Rashed, A., Voss, U., Alonso, J., Stepanova, A., Yun, J., Ljung, K., Brown, K. M., Lynch, J. P., Dolan, L., Vernoux, T., Bishopp, A., Wells, D., von Wiren, N., Bennett, M. J., and Swarup, R. (2018) A mechanistic framework for auxin dependent Arabidopsis root hair elongation to low external phosphate, *Nat Commun* 9, 1409.
